# Supplementary material
Source: PubMed Central journal article supplement (PMC4084940)
Supplement: NIHMS512411-supplement-01.pdf [file NIHMS512411-supplement-01.pdf]

| Gene symbol | Forward primer sequence   | Reverse primer sequence | GenBank<br>Accession number |
|-------------|---------------------------|-------------------------|-----------------------------|
| GAPDH       | TGCACCACCAACTGCTTAGC      | GGCATGGACTGTGGTCATGAG   | NM_001256799                |
| IL17A       | ACCAATCCCAAAGGTCCTC       | GGGGACAGAGTTCATGTGGT    | NM_002190                   |
| IL17RA      | CAGCGGTCTGGTTATCGTCT      | AAATGCCCGCCACATAGTAG    | NM_014339                   |
| RORA        | GCCTTTGACTCTCAGAACAACACCG | TCTTTCAAATTCAAACACAAAGC | NM_134261                   |
| RORC        | TTTTCCGAGGATGAGATTGC      | CTTTCCACATGCTGGCTACA    | NM_005060                   |
| IL17RC      | GCCCCATGGACAAATACATC      | CCTGTTTCAAGAGCCTCAGC    | NM_153461                   |

Supplementary Table S1. **Primers used in the study.**

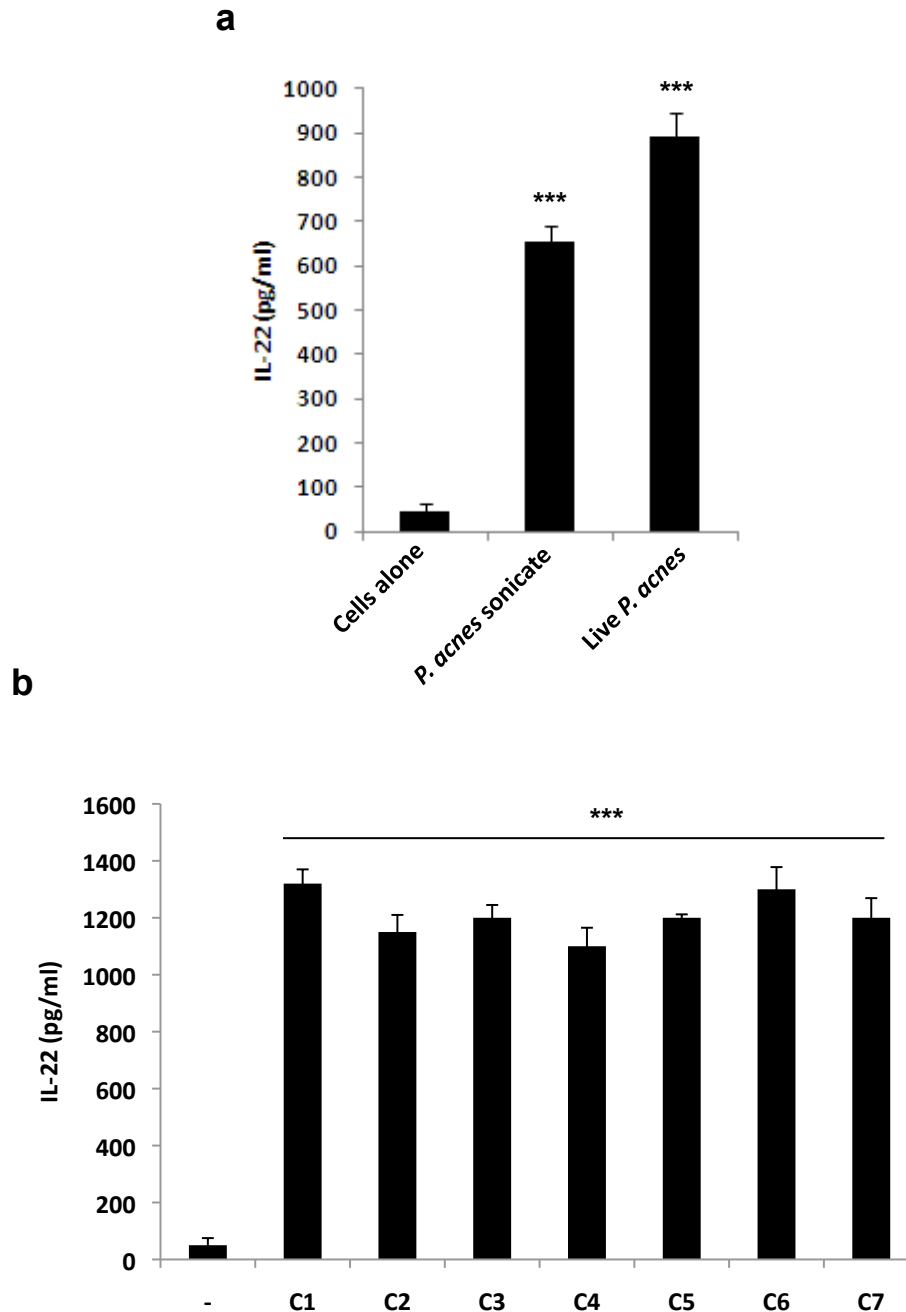

Supplementary Fig. 1. ***P. acnes* lab strain and clinical isolates stimulate production of IL-22 in human PBMCs.** **a)** PBMCs were cultured ( $2-5 \times 10^6/\text{ml}$ ) in the presence of *P. acnes* sonicate ( $2 \mu\text{g}/\text{ml}$ ), and live *P. acnes* (0.5 multiplicity of infection) for seven days. **b)** PBMCs ( $2-5 \times 10^6/\text{ml}$ ) were cultured either in the presence or absence of seven *P. acnes* clinical isolates (C1-C7). Levels of IL-22 accumulated in culture supernatants were measured using ELISA. Experiments were performed at least five times using PBMCs from five different donors with similar results. (\*\*\*) $p \leq 0.001$

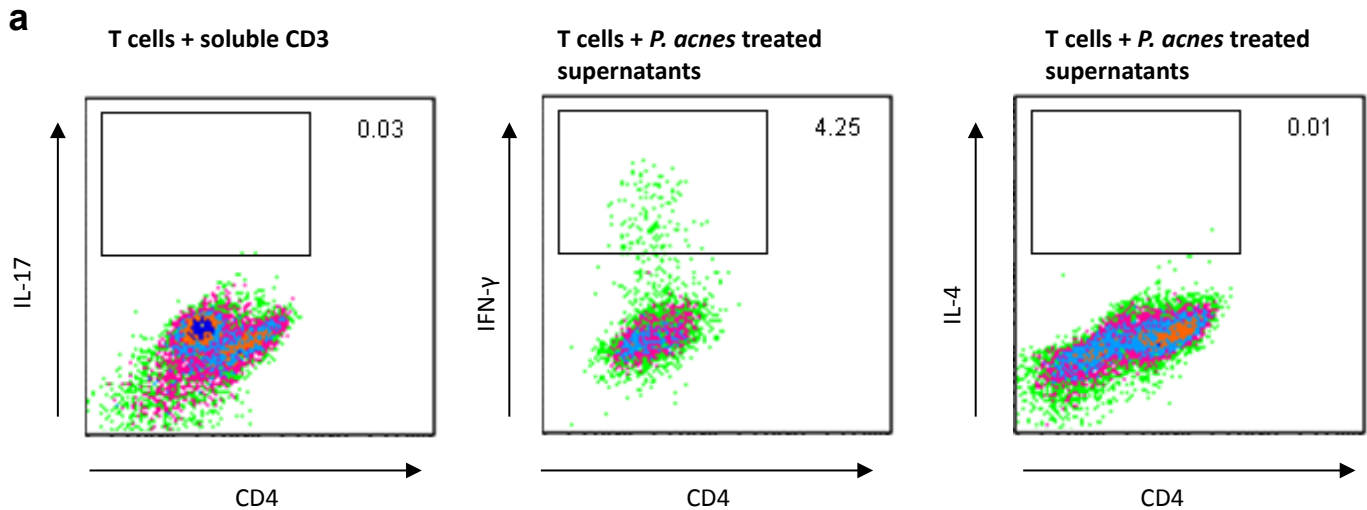

**b**

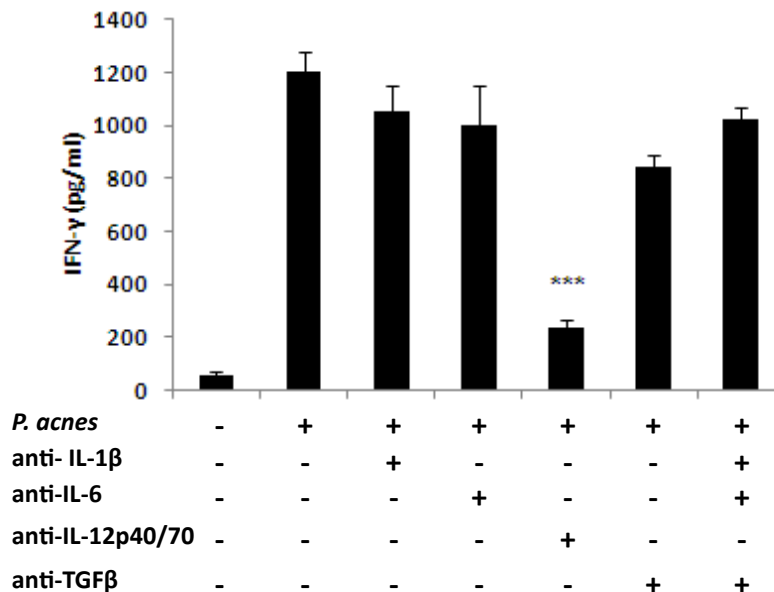

Supplementary Fig. 2. **Supernatants from PBMCs treated with *P. acnes* differentiate naïve CD4<sup>+</sup>T cells to IFN- $\gamma$  producing T cells.** **a)** PBMCs ( $2-5 \times 10^6$ /ml) were stimulated overnight with *P. acnes* sonicate (2  $\mu$ g/ml). Culture supernatants were then collected and used to stimulate naïve CD4<sup>+</sup>CD45RA T cells for seven days in 96 well plates. Cells were harvested and intracellular cytokine staining for IL-17, IFN- $\gamma$  and IL-4 was performed. Soluble CD3 was used as a control in the first panel, Each panel is representative of three independent experiments. **b)** PBMCs ( $2-5 \times 10^6$ /ml) were cultured with IL-1 $\beta$ , IL-6, IL-12p40/p70 and TGF- $\beta$  neutralizing antibodies for one hour followed by seven days of stimulation with *P. acnes*. IFN- $\gamma$  production was then measured using ELISA. Data are representative of four independent experiments. Data represent mean  $\pm$  SD (\*\*\*) $p \leq 0.001$ )

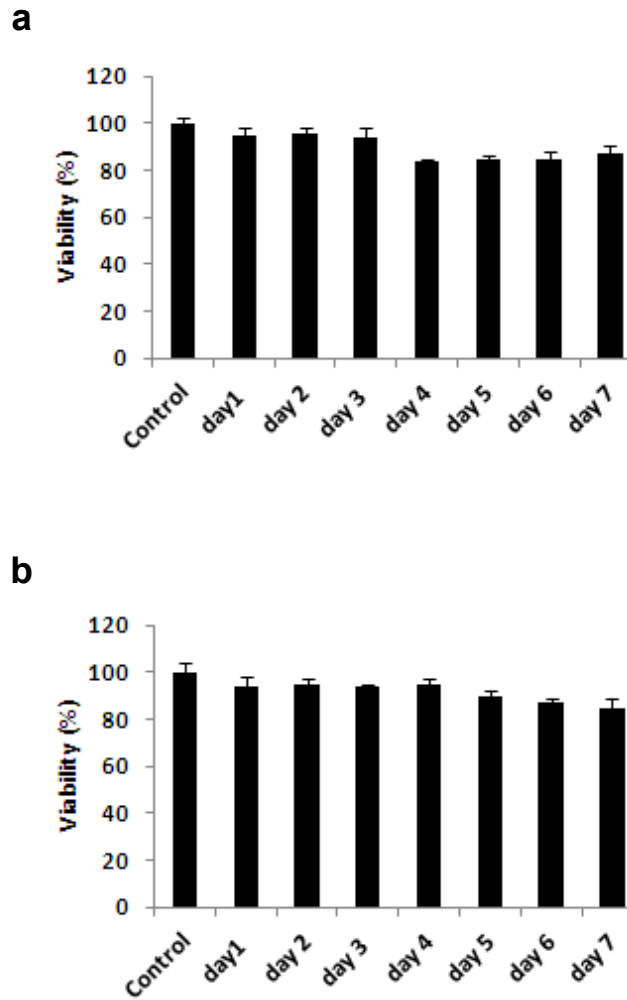

Supplementary Fig. 3. **Effects of 1,25D3, 25D3 and ATRA on cell viability.** Human PBMCs were stimulated with *P. acnes* sonicate (2  $\mu\text{g/ml}$ ) in the presence of **(a)** 1, 25D3 ( $10^{-7}$  M) and **(b)** ATRA ( $10^{-7}$  M). Cell viability was measured for 7 days in an MTT ((3-[4,5-dimethylthiazol-2-yl]-2,5 diphenyl tetrazolium bromide) assay. Each panel is representative of three independent donors.
